# Supplementary material for: Deep learning-based high-accuracy quantitation for lumbar intervertebral disc degeneration from MRI
Source: PubMed Central journal article supplement (PMC8837609; doi:10.1038/s41467-022-28387-5), 2022-02-11
Supplement: 41467_2022_28387_MOESM1_ESM.pdf [file 41467_2022_28387_MOESM1_ESM.pdf]

**Supplement Table 1 Segmentation Performance on other MR images from different cites**

| Cites                                          | Vertebral body |        | IVD    |        | Lumbar spine |        |
|------------------------------------------------|----------------|--------|--------|--------|--------------|--------|
|                                                | mDice          | mIoU   | mDice  | mIoU   | mDice        | mIoU   |
| Dongzhimen Hospital, Beijing University of CM  | 0.9567         | 0.9214 | 0.9198 | 0.8567 | 0.9193       | 0.8620 |
| Guangdong Provincial Hospital of CM            | 0.9656         | 0.9498 | 0.9337 | 0.9046 | 0.9365       | 0.8888 |
| Shenzhen Pingle Orthopedics Hospital           | 0.9654         | 0.9445 | 0.9334 | 0.8952 | 0.9269       | 0.8763 |
| Longhua Hospital, Shanghai University of TCM * | 0.9703         | 0.9425 | 0.9480 | 0.9019 | 0.9470       | 0.9035 |

\* MR images from Longhua Hospital, Shanghai University of TCM were used to train the model as Data Set and to evaluate the accuracy of segmentation performance as control.

**Supplement Table 2 Consistency analysis of intervertebral disc parameters calculated by MRI of different sizes**

| measurement | Intraclass Correlation <sup>b</sup> |              |
|-------------|-------------------------------------|--------------|
|             | ICC <sup>a</sup>                    | 95% CI       |
| $\Delta SI$ | .874***                             | (.840, .902) |
| DHI         | .958***                             | (.943, .968) |
| HDR         | .956***                             | (.886, .978) |

\*Two-way mixed effects model where people effects are random and measures effects are fixed. ICC, intraclass correlation coefficient; 95% CI, 95% confidence interval.

a. The estimator is the same, whether the interaction effect is present or not.

b. Type A intraclass correlation coefficients using an absolute agreement definition.

**Supplement Table 3 Included patient demographic information from the four sites around China**

| Site                             | Number | Age(F/M) |         |        |       |       |       |
|----------------------------------|--------|----------|---------|--------|-------|-------|-------|
|                                  |        | 20-29    | 30-39   | 40-49  | 50-59 | 60-69 | 70-89 |
| Longhua Hospital, Shanghai       |        |          |         |        |       |       |       |
| University of TCM                | 433    | 32/21    | 52/51   | 49/45  | 34/35 | 53/39 | 12/10 |
| Shenzhen Pingle Orthopedics      |        |          |         |        |       |       |       |
| Hospital                         | 222    | 16/18    | 20/20   | 19/20  | 18/21 | 13/23 | 9/25  |
| Guangdong Provincial Hospital of |        |          |         |        |       |       |       |
| Chinese Medicine                 | 246    | 19/24    | 20/15   | 23/17  | 22/17 | 18/15 | 22/34 |
| Dongzhimen Hospital, Beijing     |        |          |         |        |       |       |       |
| University of Chinese Medicine   | 150    | 7/8      | 13/18   | 21/17  | 13/8  | 12/11 | 8/14  |
| Total                            | 1051   | 74/71    | 105/104 | 112/99 | 87/81 | 96/88 | 51/83 |

**Supplement Table 4 Quantitative ranges of  $\Delta SI$  according to the modified Pfirrmann Grade (1-8)**

| modified Pfirrmann Grade       | 1                 | 2                | 3                | 4                | 5-8              |
|--------------------------------|-------------------|------------------|------------------|------------------|------------------|
| Number                         | 154               | 1130             | 1622             | 1315             | 1034             |
| $\Delta SI$<br>(mean $\pm$ SD) | 121.97 $\pm$ 9.96 | 95.34 $\pm$ 7.20 | 72.34 $\pm$ 7.81 | 44.63 $\pm$ 8.49 | 20.60 $\pm$ 9.28 |

**Supplement Table 5 Mean and standard deviation ( $\sigma$ ) of  $\Delta SI$  of healthy discs for each lumbar level and each age**

| age  | 20-30 | 30-40 | 40-50 | 50-60 | 60-70 | 70-90 |       |
|------|-------|-------|-------|-------|-------|-------|-------|
| mean | L1L2  | 98.30 | 99.03 | 95.35 | 87.28 | 94.59 | 98.30 |
|      | L2L3  | 92.82 | 90.59 | 84.83 | 86.13 | 91.63 | 92.82 |
|      | L3L4  | 86.30 | 83.31 | 76.02 | 73.88 | 86.62 | 86.30 |
|      | L4L5  | 81.46 | 71.98 | 65.47 | 58.04 | 80.47 | 81.46 |
|      | L5S1  | 69.84 | 60.41 | 42.72 | 38.48 | 73.72 | 69.84 |
| std  | L1L2  | 17.92 | 15.50 | 18.55 | 21.70 | 25.09 | 17.92 |
|      | L2L3  | 18.99 | 16.03 | 23.19 | 19.94 | 22.35 | 18.99 |
|      | L3L4  | 20.47 | 22.88 | 17.73 | 20.80 | 20.37 | 20.47 |
|      | L4L5  | 20.61 | 21.42 | 21.77 | 29.57 | 20.14 | 20.61 |
|      | L5S1  | 28.56 | 23.66 | 16.16 | 35.90 | 22.14 | 28.56 |

**Supplement Table 6 Mean and standard deviation ( $\sigma$ ) of DH of healthy discs for each lumbar level and each gender and age**

| age    |      | 20-30 | 30-40 | 40-50 | 50-60 | 60-70 | 70-90 |       |
|--------|------|-------|-------|-------|-------|-------|-------|-------|
| female | mean | L1L2  | 12.28 | 12.60 | 12.89 | 13.45 | 13.55 | 12.26 |
|        |      | L2L3  | 13.81 | 14.57 | 14.81 | 15.28 | 14.61 | 15.46 |
|        |      | L3L4  | 15.36 | 16.03 | 16.36 | 15.93 | 15.77 | 15.16 |
|        |      | L4L5  | 16.48 | 17.15 | 16.57 | 16.48 | 16.34 | 15.71 |
|        |      | L5S1  | 15.05 | 15.75 | 16.18 | 16.91 | 16.35 | 15.03 |
|        | std  | L1L2  | 1.71  | 2.13  | 1.53  | 2.22  | 1.48  | 2.79  |
|        |      | L2L3  | 1.54  | 2.37  | 1.57  | 1.89  | 1.62  | 4.26  |
|        |      | L3L4  | 1.44  | 1.90  | 1.37  | 1.69  | 1.66  | 1.98  |
|        |      | L4L5  | 1.88  | 1.96  | 1.64  | 2.22  | 1.80  | 1.74  |
|        |      | L5S1  | 2.13  | 2.42  | 2.68  | 2.47  | 3.54  | 3.17  |
| male   | mean | L1L2  | 13.30 | 14.11 | 14.54 | 15.40 | 14.70 | 13.90 |
|        |      | L2L3  | 15.02 | 16.24 | 16.15 | 17.13 | 16.68 | 15.93 |
|        |      | L3L4  | 16.56 | 17.51 | 17.49 | 17.26 | 17.14 | 16.29 |
|        |      | L4L5  | 17.34 | 17.89 | 18.00 | 17.71 | 17.16 | 15.84 |
|        |      | L5S1  | 15.37 | 15.96 | 16.21 | 16.89 | 17.68 | 15.87 |
|        | std  | L1L2  | 1.47  | 2.30  | 3.04  | 4.75  | 3.94  | 2.10  |
|        |      | L2L3  | 2.42  | 2.78  | 2.11  | 4.60  | 3.75  | 4.07  |
|        |      | L3L4  | 1.73  | 2.14  | 1.80  | 2.67  | 2.34  | 1.61  |
|        |      | L4L5  | 2.02  | 2.30  | 2.09  | 2.15  | 2.34  | 2.77  |
|        |      | L5S1  | 2.23  | 2.38  | 2.44  | 2.46  | 2.56  | 3.44  |

**Supplement Table 7 Mean and standard deviation ( $\sigma$ ) of DHI of healthy discs for each lumbar level and each gender and age**

| age    |      | 20-30 | 30-40  | 40-50  | 50-60  | 60-70  | 70-90  |        |
|--------|------|-------|--------|--------|--------|--------|--------|--------|
| female | mean | L1L2  | 0.2640 | 0.2713 | 0.2793 | 0.2964 | 0.3057 | 0.2816 |
|        |      | L2L3  | 0.2929 | 0.3138 | 0.3162 | 0.3390 | 0.3295 | 0.3607 |
|        |      | L3L4  | 0.3311 | 0.3465 | 0.3530 | 0.3574 | 0.3623 | 0.3582 |
|        |      | L4L5  | 0.3639 | 0.3784 | 0.3673 | 0.3750 | 0.3699 | 0.3673 |
|        |      | L5S1  | 0.3337 | 0.3455 | 0.3586 | 0.3838 | 0.3742 | 0.3435 |
|        | std  | L1L2  | 0.0435 | 0.0614 | 0.0399 | 0.0497 | 0.0462 | 0.0647 |
|        |      | L2L3  | 0.0388 | 0.0779 | 0.0404 | 0.0604 | 0.0479 | 0.1222 |
|        |      | L3L4  | 0.0411 | 0.0472 | 0.0342 | 0.0441 | 0.0537 | 0.0443 |
|        |      | L4L5  | 0.0502 | 0.0539 | 0.0420 | 0.0523 | 0.0507 | 0.0423 |
|        |      | L5S1  | 0.0578 | 0.0644 | 0.0671 | 0.0602 | 0.0903 | 0.0727 |
| male   | mean | L1L2  | 0.2801 | 0.2905 | 0.3063 | 0.3314 | 0.3178 | 0.3162 |
|        |      | L2L3  | 0.3156 | 0.3334 | 0.3368 | 0.3649 | 0.3674 | 0.3594 |
|        |      | L3L4  | 0.3539 | 0.3660 | 0.3694 | 0.3726 | 0.3757 | 0.3764 |
|        |      | L4L5  | 0.3843 | 0.3816 | 0.3861 | 0.3870 | 0.3751 | 0.3638 |
|        |      | L5S1  | 0.3375 | 0.3382 | 0.3493 | 0.3713 | 0.3811 | 0.3619 |
|        | std  | L1L2  | 0.0360 | 0.0556 | 0.0715 | 0.1177 | 0.0906 | 0.0523 |
|        |      | L2L3  | 0.0556 | 0.0675 | 0.0490 | 0.1068 | 0.1224 | 0.1020 |
|        |      | L3L4  | 0.0410 | 0.0508 | 0.0455 | 0.0665 | 0.0540 | 0.0472 |
|        |      | L4L5  | 0.0415 | 0.0505 | 0.0517 | 0.0605 | 0.0519 | 0.0674 |
|        |      | L5S1  | 0.0491 | 0.0589 | 0.0597 | 0.0666 | 0.0657 | 0.0819 |

**Supplement Table 8 Mean and standard deviation ( $\sigma$ ) of HDR of healthy discs for each lumbar level and each gender and age**

| age    |      | 20-30 | 30-40  | 40-50  | 50-60  | 60-70  | 70-90  |        |
|--------|------|-------|--------|--------|--------|--------|--------|--------|
| female | mean | L1L2  | 0.2209 | 0.2218 | 0.2279 | 0.2310 | 0.2293 | 0.2024 |
|        |      | L2L3  | 0.2313 | 0.2488 | 0.2454 | 0.2494 | 0.2292 | 0.2483 |
|        |      | L3L4  | 0.2534 | 0.2629 | 0.2606 | 0.2448 | 0.2377 | 0.2234 |
|        |      | L4L5  | 0.2647 | 0.2688 | 0.2570 | 0.2434 | 0.2385 | 0.2308 |
|        |      | L5S1  | 0.2532 | 0.2584 | 0.2654 | 0.2683 | 0.2571 | 0.2296 |
|        | std  | L1L2  | 0.0285 | 0.0358 | 0.0398 | 0.0338 | 0.0283 | 0.0484 |
|        |      | L2L3  | 0.0214 | 0.0963 | 0.0282 | 0.0914 | 0.0260 | 0.1108 |
|        |      | L3L4  | 0.0255 | 0.0377 | 0.0249 | 0.0326 | 0.0261 | 0.0344 |
|        |      | L4L5  | 0.0329 | 0.0345 | 0.0312 | 0.0361 | 0.0309 | 0.0289 |
|        |      | L5S1  | 0.0404 | 0.0444 | 0.0490 | 0.0373 | 0.0597 | 0.0522 |
| male   | mean | L1L2  | 0.2111 | 0.2213 | 0.2302 | 0.2686 | 0.2242 | 0.2202 |
|        |      | L2L3  | 0.2270 | 0.2399 | 0.2389 | 0.2518 | 0.2535 | 0.2646 |
|        |      | L3L4  | 0.2478 | 0.2552 | 0.2518 | 0.2447 | 0.2377 | 0.2324 |
|        |      | L4L5  | 0.2517 | 0.2554 | 0.2534 | 0.2475 | 0.2305 | 0.2203 |
|        |      | L5S1  | 0.2340 | 0.2430 | 0.2431 | 0.2475 | 0.2626 | 0.2414 |
|        | std  | L1L2  | 0.0277 | 0.0529 | 0.0640 | 0.2721 | 0.0725 | 0.0344 |
|        |      | L2L3  | 0.0361 | 0.0431 | 0.0341 | 0.0774 | 0.1435 | 0.2789 |
|        |      | L3L4  | 0.0259 | 0.0246 | 0.0276 | 0.0460 | 0.0528 | 0.0241 |
|        |      | L4L5  | 0.0297 | 0.0361 | 0.0293 | 0.0533 | 0.0340 | 0.0424 |
|        |      | L5S1  | 0.0333 | 0.0310 | 0.0373 | 0.0410 | 0.0427 | 0.0520 |



**Supplement Table 9 Imaging parameters for the MRI sequences in the 4 sites**

| Site                                                                                  | City      | Strength of the Magnet | Company | Model               | Coil                                   |
|---------------------------------------------------------------------------------------|-----------|------------------------|---------|---------------------|----------------------------------------|
| Longhua Hospital,<br>Shanghai University of<br>TCM<br><br>(Data Set A, B, C)          | Shanghai  | 1.5-Tesla              | SIEMENS | MAGNETOM<br>Aera XJ | 18-<br>channel<br>Spine Tim<br>4G coil |
| Guangdong Provincial<br>Hospital of Chinese<br>Medicine<br><br>(Data Set C)           | Guangzhou | 3-Tesla                | SIEMENS | TIM Systems         | 32-<br>channel<br>Spine Tim<br>coil    |
| Shenzhen Pingle<br>Orthopedics Hospital<br><br>(Data Set C)                           | Shenzhen  | 1.5-Tesla              | SIEMENS | MAGNETOM<br>Essenza | 8-channel<br>quadrature<br>body coil   |
| Dongzhimen Hospital,<br>Beijing University of<br>Chinese Medicine<br><br>(Data Set C) | Beijing   | 1.5-Tesla              | SIEMENS | MAGNETOM<br>Amira   | 24-channel<br>quadrature<br>body coil  |

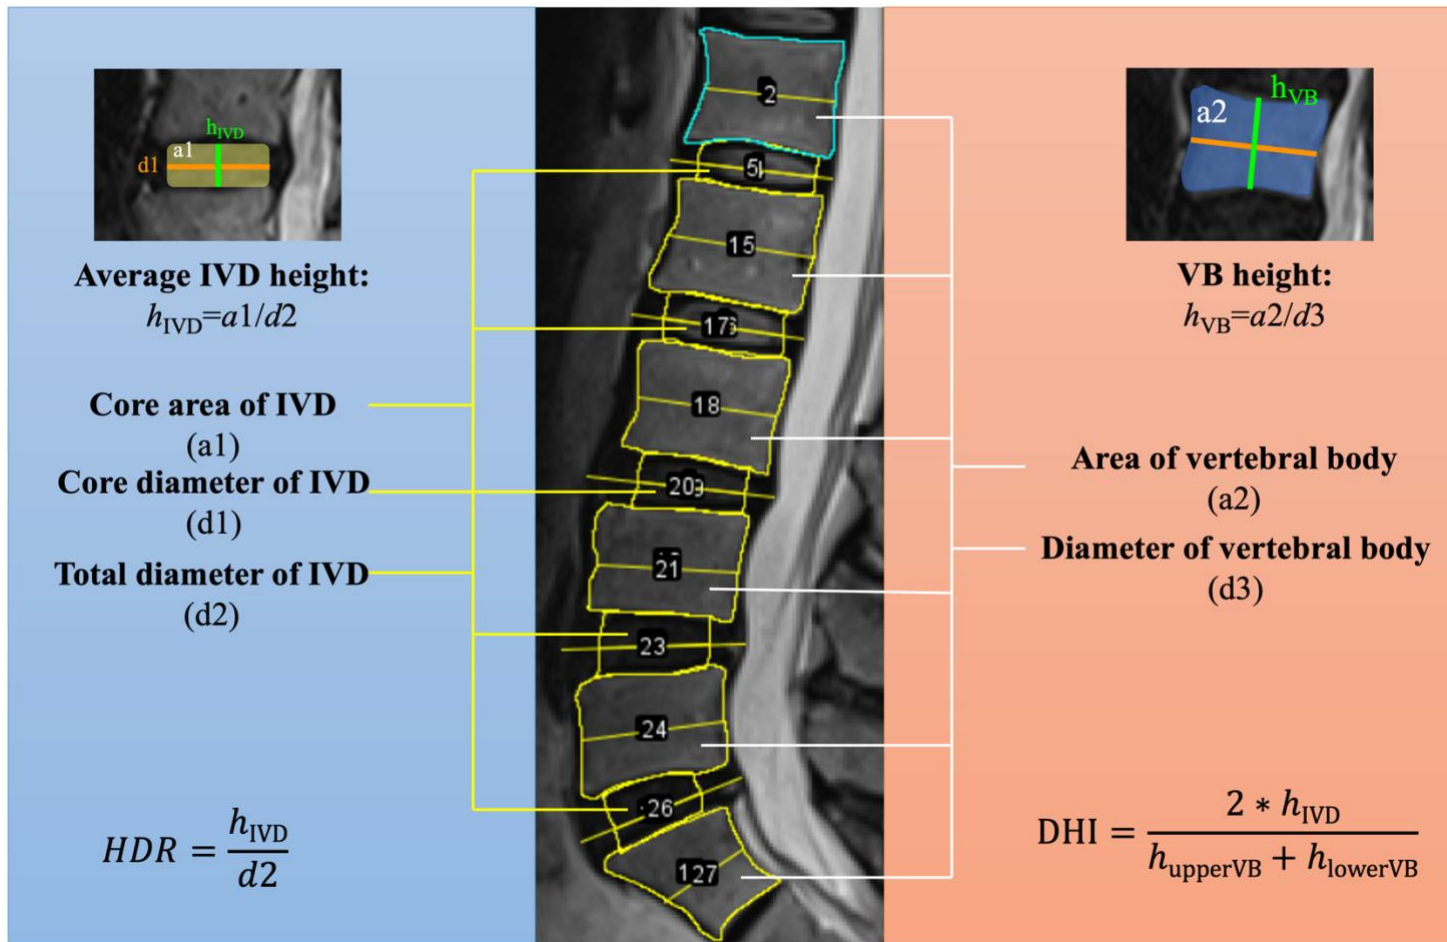

Supplement Figure 1 Scheme of manual measurement for IVD related areas.

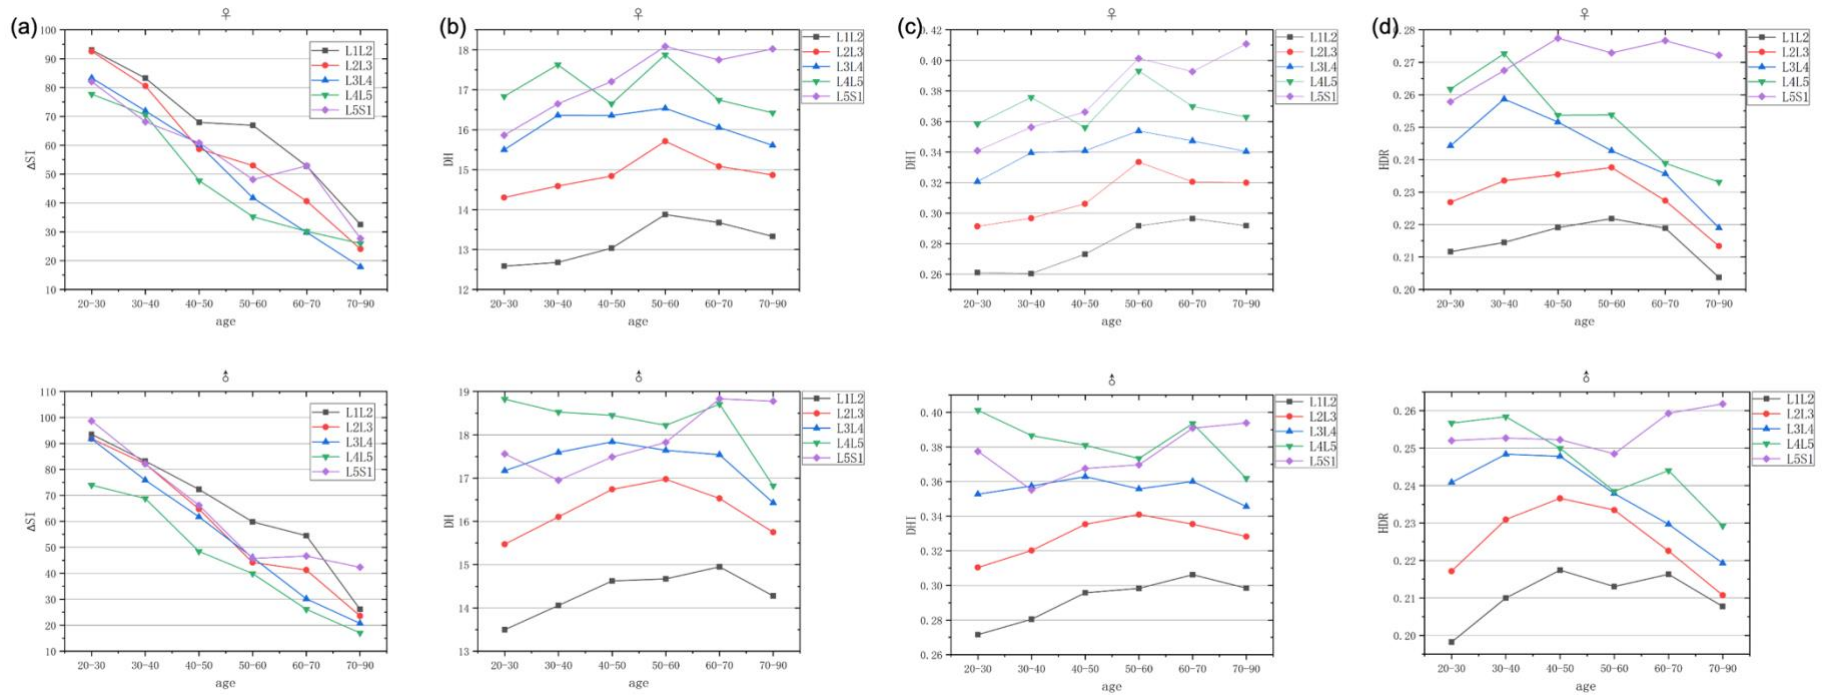

Supplement Figure 2 baseline characteristics of IVD parameters in a larger population.

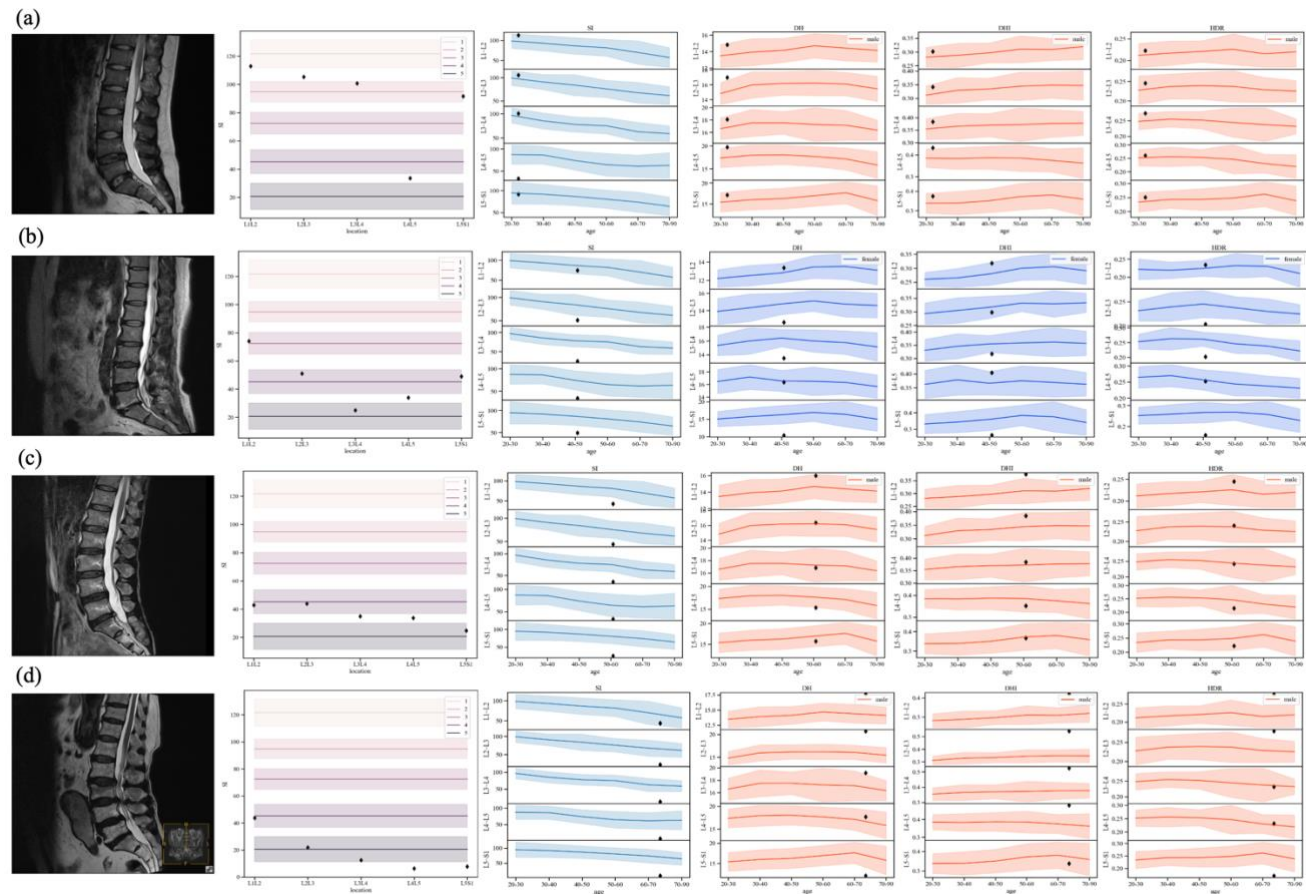

**Supplement Figure 3 Quantitative analysis results of typical cases. (a) 23-year-old male; (b) 49-year-old female; (c) 63-year-old male; (d) 81-year-old male.**

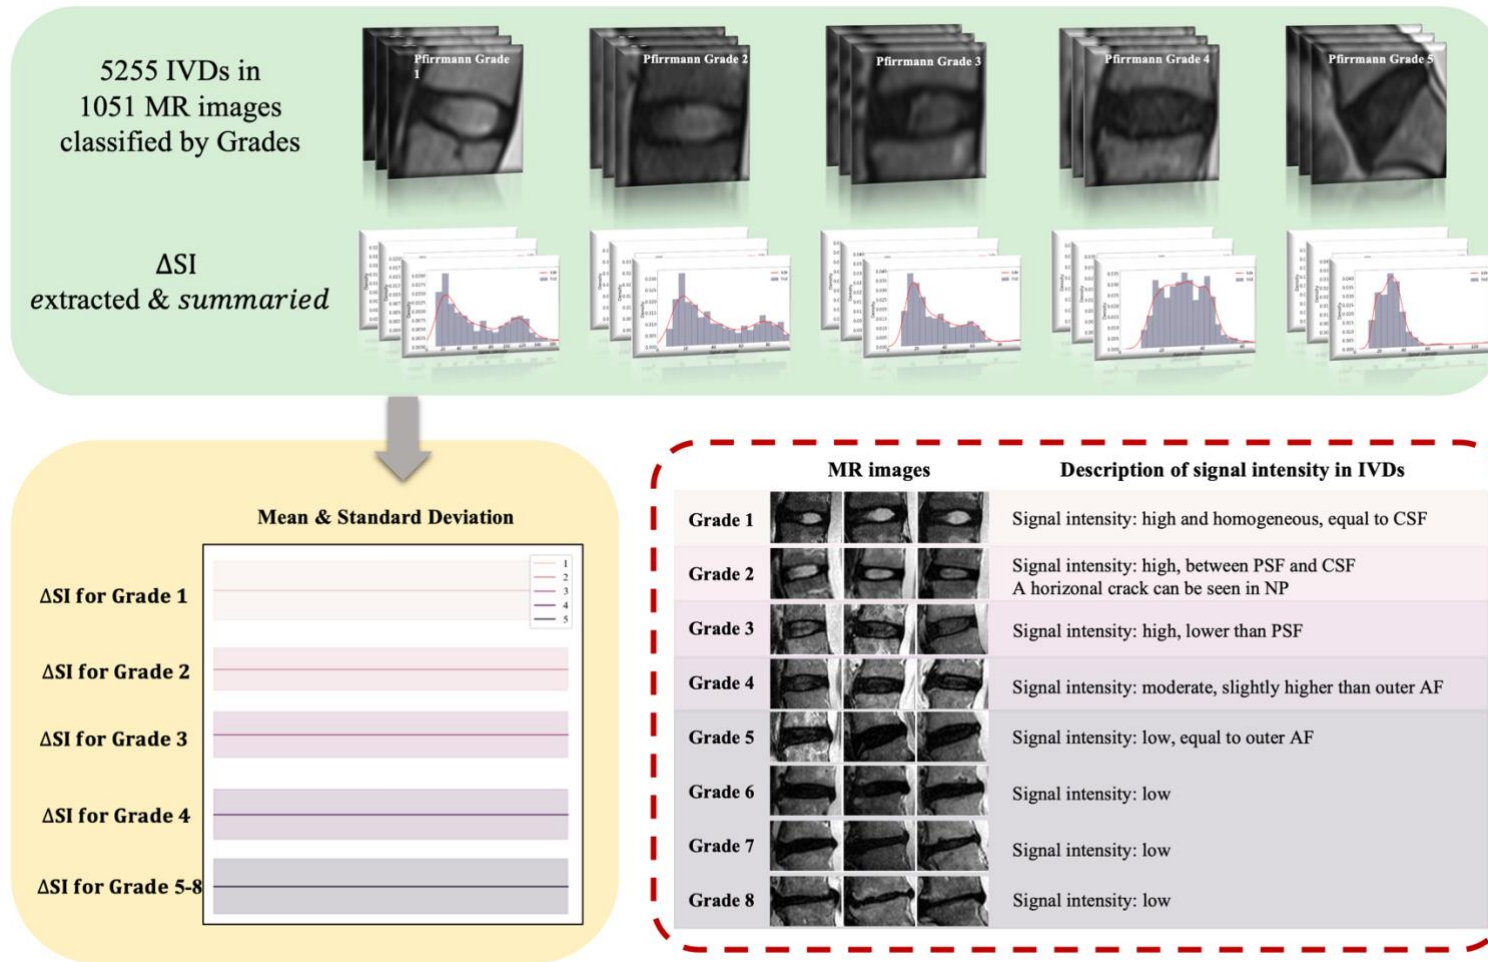

Supplement Figure 4 Scheme of IVD degeneration quantitation
