# Supplementary material for: Deep learning-based high-accuracy quantitation for lumbar intervertebral disc degeneration from MRI
Source: PubMed Central journal article supplement (PMC8837609; doi:10.1038/s41467-022-28387-5), 2022-02-11
Supplement: 41467_2022_28387_MOESM2_ESM.pdf [file 41467_2022_28387_MOESM2_ESM.pdf]

**Title: Supplementary Video 1**

**Description: BianqueNet demo in IVD degeneration quantitation**

The signal intensity quantitation result is divided into three parts: (1) signal intensity histogram of each IVD region; (2) the difference between the peak value of the disc signal intensity; (3) degeneration grade determination according to IVD signal intensity.

The geometric quantitation result is mainly divided into two parts: (1) DHI and HDR values of IVDs in each segment; (2) scatter diagram of each segment of IVD relative to the population standard.
